# Supplementary material for: Disrupted Expected Value and Prediction Error Signaling in Youths With Disruptive Behavior Disorders During a Passive Avoidance Task
Source: Atypon-hosted journal article supplement (doi:10.1176/appi.ajp.2012.12060840), 2013-03-01
Supplement: 315_ds001.pdf [file 315_ds001.pdf]

## Supplemental Methods

### *Study Measures*

**Antisocial Process Screening Device (APSD; Frick & Hare, 2001).** This is a 20-item parent-completed rating of callous-unemotional (CU) traits and conduct and impulsivity problems (Frick & Hare, 2001), designed to detect psychopathic traits in youths. A three-factor structure has been characterized comprising: CU, narcissism, and impulsivity (Frick & Hare, 2001). Participants' parents completed the ASPD during screening prior to entry into the study.

### *Participants*

All youths and parents completed Kiddie Schedule for Affective Disorders and Schizophrenia (K-SADS; Kaufman, Birmaher, Brent, Rao, & et al., 1997) assessments conducted by a doctoral-level clinician as part of a comprehensive psychiatric and psychological assessment. The K-SADS has demonstrated good validity and inter-rater reliability ( $\kappa > 0.75$  for all diagnoses; Kaufman et al., 1997). The K-SADS assesses for substance abuse and substance dependence but, due to exclusion criteria, no children in either group met criteria for these diagnoses. IQ was assessed with the Wechsler Abbreviated Scale of Intelligence (two-subtest form). Exclusion criteria were pervasive developmental disorder, Tourette's syndrome, lifetime history of psychosis, depression, bipolar disorder, generalized, social or separation anxiety disorder, PTSD, neurologic disorder, history of head trauma, history of substance abuse, and  $IQ < 70$ . Youths meeting K-SADS criteria for Conduct Disorder or Oppositional Defiant Disorder were included in the disruptive behavior disorders (DBD) group, while comparison subjects did not meet criteria for any K-SADS diagnosis.

## Supplemental Results

### *Whole-Brain Analysis Results*

In addition to the ROI analysis, a whole-brain analysis was conducted. Again, for the decision-phase analysis, activations modulated by EV to approached objects for DBD youth were compared to healthy comparison youth, as were activations to avoided objects. Similarly, in the feedback phase, activations modulated by PE for DBD youth and healthy comparison youth were contrasted for both rewarded and punished trials.

Initial thresholding was set at  $p < 0.005$  with an extent threshold of 10 voxels, a combination that has been demonstrated to produce a desirable balance between Type I and Type II error rates (Lieberman & Cunningham, 2009). Average percentage of signal change was measured within each significant cluster of 10 voxels or greater. Because of the significant group difference in IQ scores, activity within the functional ROIs identified by these four  $t$ -tests were then further analyzed by one-way ANCOVAs with IQ score as a covariate. For all the regions reported below, the introduction of the IQ covariate did not remove the significant differences between groups. In addition, these analyses were performed for a second time following the removal of 7 DBD youth the lowest IQs and the 5 healthy comparison youth with the highest IQs, such that the groups were matched on IQ (see potential confounds below).

### *Choice-Phase Data Modulated by Expectancies of Reinforcement*

Regions showing a significant difference between DBD and healthy comparison youth when choosing stimuli included vmPFC and a region of dorsomedial frontal cortex (dmFC). In both regions, DBD youth showed significantly reduced modulation by expected value (EV) relative to healthy comparison youth when responding to a stimulus.

Regions showing a significant difference between DBD and healthy comparison youth when refusing stimuli included left insula, left caudate, left lateral frontal cortex and right inferior parietal cortex. DBD youth showed significantly reduced modulated activation relative to healthy comparison youth in all regions (see Supplemental Table 1).

*Feedback Data Modulated by Prediction Error*

When receiving rewarding feedback, DBD youth showed significantly reduced activation modulated by PE relative to healthy comparison youth in left caudate. Regions showing a significant difference between DBD and healthy comparison youth when receiving punishing feedback included rostral and dorsal anterior cingulate cortex (rACC and dACC), left lateral frontal and right superior parietal cortex. Within all regions, DBD youth showed significantly greater modulation of activation by PE relative to healthy comparison youth (see Supplementary Table 1).

Supplementary Table 1: Brain Regions Demonstrating Differential BOLD Responses During Task Performance in 20 Youths with DBD and 18 Healthy Youths

| Region <sup>a</sup>                                                                        | Coordinates of Peak Activation <sup>b</sup> |    |       |       |       | t(df=37) | Voxels |
|--------------------------------------------------------------------------------------------|---------------------------------------------|----|-------|-------|-------|----------|--------|
|                                                                                            | Left/Right                                  | BA | x     | y     | z     |          |        |
| <u>DBD Youth vs. Healthy Comparison Youth: Chosen Objects Modulated by Expected Value</u>  |                                             |    |       |       |       |          |        |
| ventromedial prefrontal cortex                                                             | Right                                       | 11 | 4.5   | 58.5  | -15.5 | 3.846    | 14     |
| dorsomedial frontal cortex                                                                 | Right                                       | 32 | 7.5   | 4.5   | 35.5  | 4.487    | 25     |
| culmen                                                                                     | Left                                        | 19 | -10.5 | -58.5 | -6.5  | 3.570    | 10     |
| <u>DBD Youth vs. Healthy Comparison Youth: Refused Objects Modulated by Expected Value</u> |                                             |    |       |       |       |          |        |
| anterior insula cortex                                                                     | Left                                        | 13 | -31.5 | 4.5   | -9.5  | 4.457    | 21     |
| left caudate                                                                               | Left                                        |    | -13.5 | -1.5  | 26.5  | 4.019    | 27     |
| lateral frontal cortex                                                                     | Left                                        | 9  | -52.5 | 13.5  | 26.5  | 3.919    | 13     |
| inferior parietal lobule                                                                   | Right                                       | 40 | 49.5  | -34.5 | 47.5  | 4.896    | 29     |
| caudate/parahippocampal gyrus                                                              | Left                                        |    | -31.5 | -46.5 | 8.5   | 3.714    | 32     |
| uvula                                                                                      | Left                                        |    | -10.5 | -67.5 | -33.5 | 3.401    | 12     |
| <u>DBD Youth vs. Healthy Comparison Youth: Reward Modulated by Prediction Error</u>        |                                             |    |       |       |       |          |        |
| caudate                                                                                    | Left                                        |    | -13.5 | 7.5   | 11.5  | 3.647    | 18     |
| <u>DBD Youth vs. Healthy Comparison Youth: Punishment Modulated by Prediction Error</u>    |                                             |    |       |       |       |          |        |
| caudate                                                                                    | Left                                        |    | -13.5 | 22.5  | 11.5  | 4.090    | 10     |
| rostral anterior cingulate cortex                                                          | Left                                        | 25 | -7.5  | 22.5  | -9.5  | 3.959    | 11     |
| dorsal anterior cingulate cortex                                                           | Left                                        | 24 | -4.5  | 1.5   | 35.5  | 3.907    | 18     |
| lateral frontal cortex                                                                     | Left                                        | 9  | -43.5 | 10.5  | 26.5  | 3.858    | 17     |
| superior parietal                                                                          | Right                                       | 7  | 37.5  | -58.8 | 53.5  | 3.598    | 11     |
| middle frontal gyrus                                                                       | Right                                       | 8  | 25.5  | 16.5  | 44.5  | 4.588    | 17     |
| superior temporal cortex                                                                   | Right                                       | 38 | 37.5  | -1.5  | -15.5 | 3.898    | 10     |
| middle temporal cortex                                                                     | Right                                       | 21 | 55.5  | -28.5 | -0.5  | 4.371    | 23     |
| inferior temporal cortex/fusiform gyrus                                                    | Right                                       | 37 | 40.5  | -40.5 | -18.5 | 4.137    | 45     |
| cerebellar tonsil                                                                          | Left                                        |    | -34.5 | -58.5 | -30.5 | 4.133    | 19     |
| paracentral lobule                                                                         | Left                                        | 6  | -4.5  | -31.5 | 65.5  | 3.809    | 15     |
| culmen                                                                                     | Right                                       |    | 13.5  | -34.5 | -18.5 | 4.409    | 25     |
| culmen                                                                                     | Left                                        |    | -37.5 | -46.5 | -24.5 | 3.997    | 13     |
| culmen                                                                                     | Left                                        |    | -10.5 | -34.5 | -12.5 | 3.935    | 10     |

<sup>a</sup> According to the Talairach Daemon Atlas (<http://www.nitrc.org/projects/tal-daemon/>). <sup>b</sup> Based on the standard brain template of the Montreal Neurological Institute (MNI). BA= Brodmann's Area, df= degrees of freedom

Supplementary Table 2: Brain Regions Demonstrating Differential BOLD Responses During Task Performance in 18 Unmedicated Youths with DBD and 18 Healthy Youths

| Region <sup>a</sup>                                                                        | Coordinates of Peak Activation <sup>b</sup> |    |       |      |       | t (df=37) | Voxels |
|--------------------------------------------------------------------------------------------|---------------------------------------------|----|-------|------|-------|-----------|--------|
|                                                                                            | Left/Right                                  | BA | x     | y    | z     |           |        |
| <u>DBD Youth vs. Healthy Comparison Youth: Chosen Objects Modulated by Expected Value</u>  |                                             |    |       |      |       |           |        |
| ventromedial prefrontal cortex                                                             | Right                                       | 11 | 4.5   | 58.5 | -15.5 | 3.674     | 10     |
| <u>DBD Youth vs. Healthy Comparison Youth: Refused Objects Modulated by Expected Value</u> |                                             |    |       |      |       |           |        |
| anterior insula cortex                                                                     | Left                                        | 13 | -31.5 | 4.5  | -9.5  | 4.183     | 19     |
| caudate                                                                                    | Left                                        |    | -13.5 | -1.5 | 26.5  | 3.891     | 26     |
| <u>DBD Youth vs. Healthy Comparison Youth: Reward Modulated by Prediction Error</u>        |                                             |    |       |      |       |           |        |
| caudate                                                                                    | Left                                        |    | -13.5 | 7.5  | 11.5  | 3.556     | 5      |
| <u>DBD Youth vs. Healthy Comparison Youth: Punishment Modulated by Prediction Error</u>    |                                             |    |       |      |       |           |        |
| caudate                                                                                    | Left                                        |    | -13.5 | 22.5 | 11.5  | 4.090     | 10     |

<sup>a</sup> According to the Talairach Daemon Atlas (<http://www.nitrc.org/projects/tal-daemon/>). <sup>b</sup> Based on the standard brain template of the Montreal Neurological Institute (MNI). BA= Brodmann's Area, df= degrees of freedom  
DBD= disruptive behavior disorders

Supplementary Table 3: Brain Regions Demonstrating Differential BOLD Responses During Task Performance in 16 Youths with DBD, but Without ADHD and 18 Healthy Youths

| Region <sup>a</sup>                                                                        | Coordinates of Peak Activation <sup>b</sup> |    |       |      |       | t (df=37) | Voxels |
|--------------------------------------------------------------------------------------------|---------------------------------------------|----|-------|------|-------|-----------|--------|
|                                                                                            | Left/Right                                  | BA | x     | y    | z     |           |        |
| <u>DBD Youth vs. Healthy Comparison Youth: Chosen Objects Modulated by Expected Value</u>  |                                             |    |       |      |       |           |        |
| ventromedial prefrontal cortex                                                             | Right                                       | 10 | 4.5   | 58.5 | -15.5 | 3.690     | 10     |
| <u>DBD Youth vs. Healthy Comparison Youth: Refused Objects Modulated by Expected Value</u> |                                             |    |       |      |       |           |        |
| anterior insula cortex                                                                     | Left                                        | 13 | -31.5 | 4.5  | -9.5  | 3.963     | 13     |
| left caudate                                                                               | Left                                        |    | -13.5 | -1.5 | 26.5  | 3.662     | 21     |
| <u>DBD Youth vs. Healthy Comparison Youth: Reward Modulated by Prediction Error</u>        |                                             |    |       |      |       |           |        |
| caudate                                                                                    | Left                                        |    | -13.5 | 7.5  | 11.5  | 3.556     | 5      |
| <u>DBD Youth vs. Healthy Comparison Youth: Punishment Modulated by Prediction Error</u>    |                                             |    |       |      |       |           |        |
| caudate                                                                                    | Left                                        |    | -13.5 | 22.5 | 11.5  | 4.587     | 9      |

<sup>a</sup> According to the Talairach Daemon Atlas (<http://www.nitrc.org/projects/tal-daemon/>). <sup>b</sup> Based on the standard brain template of the Montreal Neurological Institute (MNI). BA= Brodmann's Area, df= degrees of freedom  
 DBD= disruptive behavior disorders, ADHD= Attention Deficit-Hyperactivity Disorder

Supplementary Table 4: Characteristics of DBD Youth and Healthy Youth Matched for IQ

| Characteristic  | <u>DBD Youth</u><br>(N=13) |               | <u>Healthy Youth</u><br>(N=13) |               |
|-----------------|----------------------------|---------------|--------------------------------|---------------|
|                 | Mean                       | (SD)          | Mean                           | (SD)          |
| Age (years)     | 15.32                      | (2.12)        | 15.09                          | (2.17)        |
| IQ <sup>a</sup> | 97.77                      | (5.95)        | 103.69                         | (10.61)       |
| APSD            | 25.69**                    | (7.97)        | 6.46**                         | (4.26)        |
| CU              | 7.68**                     | (2.69)        | 1.31**                         | (1.65)        |
| NAR             | 9.37**                     | (3.05)        | 1.15**                         | (1.46)        |
| IMP             | 7.28**                     | (2.02)        | 1.54**                         | (0.97)        |
|                 | <u>N</u>                   | <u>%</u>      | <u>N</u>                       | <u>%</u>      |
| Gender          | 10 male                    | (76.92% male) | 8 male                         | (61.54% male) |
| Race/ethnicity  | 12 minority                | (95.00%)      | 9 minority                     | (55.56%)      |
|                 | <u>DSM-IV Diagnoses</u>    |               |                                |               |
| CD              | 11                         | 84.6%         | 0                              | 0%            |
| ODD             | 2                          | 15.4%         | 0                              | 0%            |
| ADHD            | 4                          | 30.8%         | 0                              | 0%            |

SD = Standard Deviation

DBD= disruptive behavior disorder

APSD= Antisocial Process Screening Device, CU= APSD Callous-Unemotional subscale,

NAR= APSD Narcissism subscale, IMP= APSD Impulsive/Antisocial subscale

CD= Conduct Disorder, ODD= Oppositional Defiant Disorder, ADHD= Attention Deficit Hyperactivity Disorder

<sup>a</sup> Assessed with the Wechsler Abbreviated Scale of Intelligence (two-subtest form)\*\* significantly different at  $p < .001$

Supplementary Table 5: One sample *t*-tests Comparing BOLD Response During Decision-Making and Feedback to Baseline Activation in DBD Youth and Healthy Youth

| Region                                                  | <u>DBD Youth</u> |          | <u>Healthy Youth</u> |          |
|---------------------------------------------------------|------------------|----------|----------------------|----------|
|                                                         | <i>t</i> (df=17) | <i>p</i> | <i>t</i> (19)        | <i>p</i> |
| <u>Chosen Objects Modulated by Expected Value</u>       |                  |          |                      |          |
| vmPFC                                                   | -3.357           | .002     | 2.155                | .046     |
| <u>Refused Objects Modulated by Expected Value</u>      |                  |          |                      |          |
| AIC                                                     | -2.820           | .011     | 2.994                | .008     |
| <u>Rewarding Feedback Modulated by Prediction Error</u> |                  |          |                      |          |
| caudate                                                 | -1.760           | .095     | 4.121                | .001     |
| <u>Punishing Feedback Modulated by Prediction Error</u> |                  |          |                      |          |
| caudate                                                 | 3.779            | .001     | -2.191               | .043     |

df = degrees of freedom, DBD= disruptive behavior disorder  
vmPFC= ventromedial prefrontal cortex, AIC= anterior insula cortex

- Frick, & Hare. (2001). *The Antisocial Process Screening Device*. Toronto: Multi-Health Systems.
- Kaufman, J., Birmaher, B., Brent, D., Rao, U., & et al. (1997). Schedule for Affective Disorders and Schizophrenia for School-Age Children-Present and Lifetime version (K-SADS-PL): Initial reliability and validity data. *Journal of the American Academy of Child & Adolescent Psychiatry*, 36(7), 980-988.
- Lieberman, M. D., & Cunningham, W. A. (2009). Type I and Type II error concerns in fMRI research: Re-balancing the scale. *Social Cognitive and Affective Neuroscience*, 4(4), 423-428.
